# Supplementary material for: Extracellular Matrix Biomimetic Hydrogels, Encapsulated with Stromal Cell-Derived Factor 1, Improve the Composition of Foetal Tissue Grafts in a Rodent Model of Parkinson’s Disease
Source: MDPI journal article supplement (doi:10.3390/ijms23094646), 2022-04-22
Supplement: s1 [file s1]

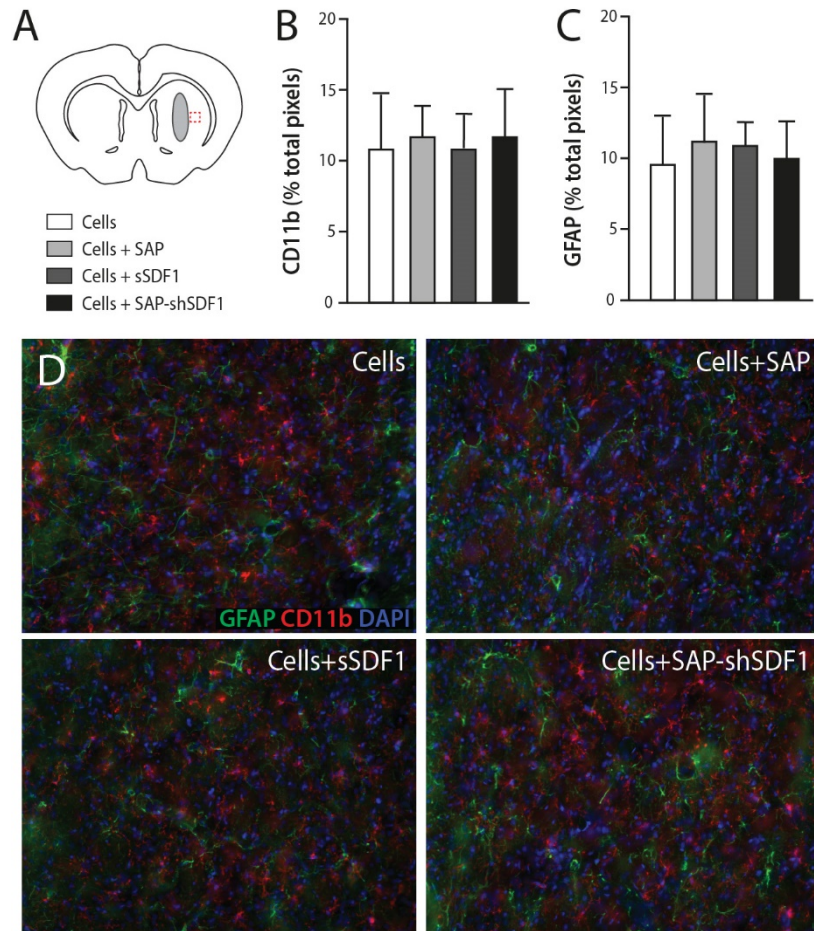

**Supplementary Figure S1 – SDF1 functionalised hydrogels do not evoke a host inflammatory response.**

(A) Schematic illustration showing a coronal section of the mouse brain, depicting the graft (grey) and the sampling site (red box) lateral to the graft-host border for assessment of the host inflammatory response to. (B) Density of CD11b microglia and (C) GFAP+ reactive astrocytes (expressed as the percentage of immunoreactive pixels) was unchanged by the presence of the SAP hydrogel and/or SDF1 protein. (D) Representative photomicrographs of GFAP+ astrocytes and CD11b+ microglia taken at the graft-host border from the 4 grafting groups. Data represents Mean  $\pm$  SEM, n=4/group.
